# Supplementary material for: Distinct pro-inflammatory properties of myeloid cell–derived apolipoprotein E2 and E4 in atherosclerosis promotion
Source: PubMed Central journal article supplement (PMC8437825; doi:10.1016/j.jbc.2021.101106), 2021-08-21

## SUPPORTING INFORMATION

**Table S1. Antibodies used**

| Target antigen        | Vendor or Source  | Catalog #  | Working concentration | Persistent ID / URL |
|-----------------------|-------------------|------------|-----------------------|---------------------|
| NLRP3                 | Abcam             | Ab263899   | 1:1000                | RRID: AB_2889890    |
| Caspase 1             | Abcam             | EPR16883   | 1:1000                | RRID: AB_2884954    |
| $\beta$ -actin        | Cell Signaling    | 4970L      | 1:1000                | RRID: AB_2223172    |
| GAPDH                 | Cell Signaling    | 2118S      | 1:1000                | RRID: AB_561053     |
| Sca1                  | Life Technologies | 45-5981-82 | 1:100                 | RRID: AB_914732     |
| c-kit                 | Life Technologies | 17-1171-82 | 1:100                 | RRID: AB_469430     |
| CD48                  | Life Technologies | 47-0481-82 | 1:100                 | RRID: AB_2573962    |
| CD34 (FITC)           | eBioscience       | 11-0341-82 | 1:100                 | RRID: AB_465021     |
| CD49                  | Life Technologies | 12-5971-83 | 1:100                 | RRID: AB_466074     |
| CD16/CD32             | Life Technologies | 25-0161-82 | 1:100                 | RRID: AB_469598     |
| CD11b                 | BD Biosciences    | 557657     | 1:100                 | RRID: AB_396772     |
| CD115                 | eBioscience       | 12-1152-82 | 1:100                 | RRID: AB_465808     |
| Ly6G                  | BD Biosciences    | 560602     | 1:100                 | RRID: AB_1727563    |
| Ly6C                  | BD Biosciences    | 560595     | 1:100                 | RRID: AB_1727554    |
| CD3e (PerCP-Cy5.5)    | BD Biosciences    | 551163     | 2 $\mu$ g/ml          | RRID: AB_394082     |
| CD4 (FITC)            | Invitrogen        | 11-0042-82 | 2.5 $\mu$ g/ml        | RRID: AB_464896     |
| CD8a (APC-Cy7)        | Life Technologies | A15386     | 10 $\mu$ g/ml         | RRID: AB_2534400    |
| CD44                  | BioLegend         | 103012     | 2.5 $\mu$ g/ml        | RRID: AB_312963     |
| CD62L (PE-Cy7)        | BioLegend         | 104418     | 2.5 $\mu$ g/ml        | RRID: AB_313103     |
| IL-1 $\beta$          | Novus             | NB600-633  | 1:200                 | RRID: AB_10001060   |
| Nitrotyrosine         | Invitrogen        | A21285     | 1:200                 | RRID: AB_221457     |
| Anti-rabbit IgG (HRP) | Cell Signaling    | 7074S      | 1:2000                | RRID: AB_2099233    |

**Table S2. Primers used**

| Name                   | Sequence                   |
|------------------------|----------------------------|
| ABCA1 forward          | ACCCACCCTACGAACAACATGAGT   |
| ABCA1 reverse          | AAAGTTTCCAACAACACCGGGAGC   |
| ABCG1 forward          | AAAGGTCTCCAATCTCGTGCCGTA   |
| ABCG1 reverse          | TATAGTCAGCGTCACACATGCCCT   |
| MCP-1 forward          | CTTCCTCCACCACCATGCA        |
| MCP-1 reverse          | CCAGCCGGCAACTGTGA          |
| MIP-1 $\alpha$ forward | TTTGA AAC CAGCAGCCTTTGCTCC |
| MIP-1 $\alpha$ reverse | TCAGGCATTCAGTTCAGGTCAGT    |
| PPAR $\gamma$ forward  | CTGCAGGCCCTGGA ACTG        |
| PPAR $\gamma$ reverse  | CGATCTGCCTGAGGTCTGTCA      |
| LXR $\alpha$ forward   | CGACAGAGCTTCGTCCACAA       |
| LXR $\alpha$ reverse   | GCTCGTTC C C C CAGCATT T T |
| Cyclophilin forward    | TCATGTGCCAGGGTG GTGAC      |
| Cyclophilin reverse    | CCATTCAGTCTTG GCAGTGC      |

**Figure S1. Gating strategies used for flow cytometry analysis of T lymphocyte subsets**

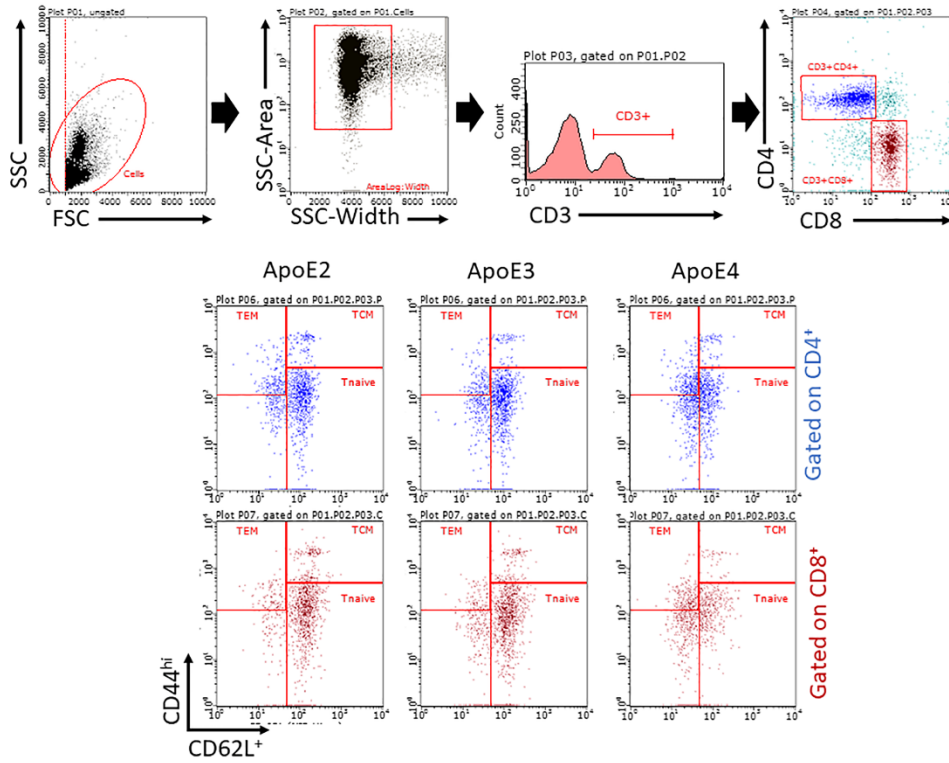

Supplement: mmc1.pdf [file mmc1.pdf]
